# Supplementary material
Source: HighWire-hosted journal article supplement (https://www.cmaj.ca/highwire/filestream/57784/field_highwire_adjunct_files/1/mat-online-appendix_2.pdf)
Supplement: mat-online-appendix_2.pdf [file mat-online-appendix_2.pdf]

## **Appendix 2 (as supplied by the authors): National and international trials registries searched**

1. The Association of the British Pharmaceutical Industry (ABPI) – Pharmaceutical Industry Clinical Trials database: [www.cmrinteract.com/clintrial/](http://www.cmrinteract.com/clintrial/)
2. The Australian New Zealand Clinical Trials Registry: [www.anzctr.org.au/](http://www.anzctr.org.au/)
3. CenterWatch Clinical Trials Listing Service: [www.centerwatch.com/](http://www.centerwatch.com/)
4. Chinese Clinical Trial Register: [www.chictr.org/Default.aspx](http://www.chictr.org/Default.aspx)
5. ClinicalTrials.gov register: [clinicaltrials.gov/](http://clinicaltrials.gov/)
6. Community Research & Development Information Service (of the European Union) (trials and other research): [cordis.europa.eu/en/home.html](http://cordis.europa.eu/en/home.html)
7. Current Controlled Trials *meta*Register of Controlled Trials (*mRCT*) – active registers: [www.controlled-trials.com/mrct/](http://www.controlled-trials.com/mrct/)
8. Current Controlled Trials *meta*Register of Controlled Trials (*mRCT*) – archived registers: [www.controlled-trials.com/mrct/archived](http://www.controlled-trials.com/mrct/archived)
9. European Medicines Agency (EMA): [www.emea.europa.eu/index/indexh1.htm](http://www.emea.europa.eu/index/indexh1.htm)
10. Hong Kong clinical trials register - HKClinicalTrials.com: [www.hkclinicaltrials.com/](http://www.hkclinicaltrials.com/)
11. Indian clinical trials registry - Clinical Trials Registry-India (CTRI): [www.ctri.in](http://www.ctri.in)
12. International Clinical Trials Registry Platform Search Portal: [www.who.int/trialsearch](http://www.who.int/trialsearch)
13. International Federation of Pharmaceutical Manufacturers and Associations (IFPMA) Clinical Trials Portal: [www.ifpma.org/clinicaltrials.html](http://www.ifpma.org/clinicaltrials.html)
14. International Standard Randomised Controlled Trial Number Register: [www.controlled-trials.com/isrctn/](http://www.controlled-trials.com/isrctn/)
15. Netherlands trial register (Nederlands Trialregister – in Dutch): [www.trialregister.nl/trialreg/index.asp](http://www.trialregister.nl/trialreg/index.asp)
16. South African National Clinical Trial Register: [www.sanctr.gov.za/](http://www.sanctr.gov.za/)
17. UK Clinical Research Network Portfolio Database: [portal.nihr.ac.uk/Pages/Portfolio.aspx](http://portal.nihr.ac.uk/Pages/Portfolio.aspx)
18. UK Clinical Trials Gateway: [www.controlled-trials.com/ukctr/](http://www.controlled-trials.com/ukctr/)
19. UK National Research Register (NRR) (trials and other research – archived September 2007 – see UK Clinical Trials Gateway): [portal.nihr.ac.uk/Pages/NRRArchive.aspx](http://portal.nihr.ac.uk/Pages/NRRArchive.aspx)
20. University hospital Medical Information Network (UMIN) Clinical Trials Registry (for Japan) – UMIN CTR: [www.umin.ac.jp/ctr/](http://www.umin.ac.jp/ctr/)
